# Supplementary material
Source: Research Square preprint supplement (doi:10.21203/rs.3.rs-9097932/v1)
Supplement: Supplementary file 1 [file 6d3ca29155cd88e40196c260.docx]

| Table 3. Correlation Analysis Between HALP and Risk Scores | | | |
| --- | --- | --- | --- |
| Variable |  | **STS Score** | **EuroSCORE II** |
| HALP |  | -0.111** (p=0.010) | -0.113** (p=0.008) |
| Values are Pearson correlation coefficients (r). ** p < 0.01 (2-tailed). | | | |
