# Supplementary material
Source: Research Square preprint supplement (doi:10.21203/rs.3.rs-9097932/v1)
Supplement: Supplementary file 2 [file 7f8d8c8bb4b8c950949f436e.docx]

| Table 5. Discriminatory Performance of HALP, STS Score, and the Combined Model for Mortality Prediction | | | | |
| --- | --- | --- | --- | --- |
| Model | **AUC** | **Standard Error** | **95% Confidence Interval** | **p value*** |
| HALP score | 0.591 | 0.027 | 0.539–0.643 | 0.001 |
| STS score | 0.622 | 0.026 | 0.570–0.673 | <0.001 |
| STS score + HALP score | 0.663 | 0.026 | 0.612–0.715 | <0.001 |
| AUC, area under the curve; HALP, hemoglobin, albumin, lymphocyte, and platelet score; STS, Society of Thoracic Surgeons score.  * p values are derived from the null hypothesis that AUC = 0.50. AUCs were calculated under the nonparametric assumption. | | | | |
