# Supplementary material
Source: Research Square preprint supplement (doi:10.21203/rs.3.rs-9097932/v1)
Supplement: Supplementary file 3 [file 90ec124ba1afb4ab9445c7d8.docx]

| Table X. Multivariable Logistic Regression Analysis for Mortality | | | |
| --- | --- | --- | --- |
| Variable | **OR** | **95% CI** | **p-value** |
| HALP | 0.985 | 0.974–0.996 | 0.007 |
| Female sex | 1.601 | 1.071–2.392 | 0.022 |
| Age | 0.997 | 0.972–1.023 | 0.817 |
| COPD | 1.257 | 0.844–1.872 | 0.260 |
| STS score | 1.112 | 1.045–1.184 | 0.001 |
| DM history | 0.938 | 0.608–1.448 | 0.774 |

| Table X. Multivariable Logistic Regression Analysis for Mortality | | | |
| --- | --- | --- | --- |
| Variable | **OR** | **95% CI** | **p-value** |
| HALP (per 10-unit increase) | 0.859 | 0.770–0.960 | 0.007 |
| Female sex | 1.601 | 1.071–2.392 | 0.022 |
| Age | 0.997 | 0.972–1.023 | 0.817 |
| COPD | 1.257 | 0.844–1.872 | 0.260 |
| STS score | 1.112 | 1.045–1.184 | 0.001 |
| DM history | 0.938 | 0.608–1.448 | 0.774 |
