# Supplementary material
Source: Research Square preprint supplement (doi:10.21203/rs.3.rs-9097932/v1)
Supplement: Supplementary file 4 [file a2bebab0a33452b680472802.docx]

| Table 1. Baseline Clinical, Laboratory and Echocardiographic Characteristics According to Mortality | | | | |
| --- | --- | --- | --- | --- |
| Variable | **Total (n=544)** | **No Mortality (n=390)** | **Mortality (n=154)** | **p value** |
| Age (years) | 78 (71–84) | 78 (71–84) | 79 (72–85) | 0.447 |
| Female sex(n) | 299 (55.0%) | 199 (51.0%) | 100 (64.9%) | **0.003** |
| BMI (kg/m²) | 26.4 (23.0–29.8) | 26.1 (23.3–29.1) | 27.0 (22.3–31.3) | 0.061 |
| Prior CABG(n) | 137 (25.2%) | 101 (25.9%) | 36 (23.4%) | 0.542 |
| Prior MI (n) | 63 (11.6%) | 37 (9.5%) | 26 (16.9%) | **0.015** |
| Prior PCI (n) | 187 (34.4%) | 129 (33.1%) | 58 (37.7%) | 0.310 |
| COPD (n) | 204 (37.5%) | 137 (35.1%) | 67 (43.5%) | 0.069 |
| Diabetes mellitus (n) | 162 (29.8%) | 111 (28.5%) | 51 (33.1%) | 0.285 |
| Hypertension (n) | 459 (84.4%) | 322 (82.6%) | 137 (89.0%) | 0.064 |
| Atrial fibrillation (n) | 142 (26.1%) | 95 (24.4%) | 47 (30.5%) | 0.141 |
| Baseline EF (%) | 50.3 | 51.15 | 48.62 | 0.019 |
| Bicuspid valve (n) | 76 (14.0%) | 62 (15.9%) | 14 (9.1%) | **0.041** |
| Baseline AVA (cm²) | 0.67 (0.52–0.85) | 0.68 (0.52–0.84) | 0.70 (0.50–0.87) | 0.800 |
| Baseline sPAP (mmHg) | 44 (30–60) | 40 (30–60) | 45 (35–65) | 0.106 |
| Mean CT Annulus (mm) | 24.8 (23–27) | 24.5 (23–26.5) | 25.0 (22.5–27.0) | 0.446 |
| Creatinine (mg/dL) | 1.02 (0.80–1.40) | 0.97 (0.77–1.30) | 1.10 (0.82–1.47) | 0.001 |
| eGFR (mL/min/1.73m²) | 63.8 | 65.02 | 59.64 | 0.009 |
| Continuous variables are expressed as mean ± standard deviation or median (interquartile range [IQR]) according to data distribution. Between-group comparisons for continuous variables were performed using the Mann–Whitney U test, as appropriate. Categorical variables are presented as counts and percentages (n%). Comparisons between groups were conducted using the Pearson χ² test or Fisher’s exact test, as appropriate. All tests were two-sided, and a p value <0.05 was considered statistically significant. Mortality was defined as all-cause mortality during the 2-year follow-up period. | | | | |
