# Supplementary material
Source: Research Square preprint supplement (doi:10.21203/rs.3.rs-9097932/v1)
Supplement: Supplementary file 5 [file dcf1cb7e3ba4c92651885b5b.docx]

| Table 2. Prognostic Risk Scores and Inflammatory Parameters According to 2-Year Mortality | | | | |
| --- | --- | --- | --- | --- |
| Variable | **Total (n=544)** | **No Mortality (n=390)** | **Mortality (n=154)** | **p value** |
| STS score (%)† | 5.7 (3.4–9.3) | 5.12 (3.15–8.16) | 6.70 (3.90–10.23) | <0.001 |
| EuroSCORE II (%)‡ | 9.2 ± SD | 8.12 ± SD | 11.44 ± SD | <0.001 |
| Logistic EuroSCORE (%)† | 18.2 (10–35) | 15.55 (9.52–33.00) | 19.90 (10.50–40.00) | 0.030 |
| HALP score† | 30.1 (18–47) | 31.35 (19.24–49.49) | 26.91 (14.68–40.69) | 0.001 |
| C-reactive protein (mg/L)‡ | 7.0 ± 8.7 | 6.57 ± 8.76 | 8.12 ± 8.48 | 0.061* |
| Neutrophil (×10³/µL)‡ | 5.09 ± 2.07 | 4.95 ± 1.93 | 5.47 ± 2.33 | 0.008 |
| Monocyte (×10³/µL)‡ | 0.62 ± 0.28 | 0.60 ± 0.28 | 0.69 ± 0.29 | <0.001 |
| Lymphocyte (×10³/µL)‡ | 1.65 ± 0.71 | 1.68 ± 0.72 | 1.57 ± 0.67 | 0.107 |
| Albumin (g/dL)‡ | 3.80 ± 0.36 | 3.83 ± 0.34 | 3.72 ± 0.42 | 0.002 |
| Hemoglobin (g/dL)‡ | 11.73 ± 1.88 | 11.86 ± 1.89 | 11.41 ± 1.84 | 0.013 |
| † Values are presented as median (interquartile range [IQR]). ‡ Values are presented as mean ± standard deviation (SD). Between-group comparisons were performed using the independent samples t-test for normally distributed variables and the Mann–Whitney U test for non-normally distributed variables, as appropriate. All tests were two-sided, and p<0.05 was considered statistically significant. Mortality was defined as all-cause mortality during the 2-year follow-up period. | | | | |
